# Supplementary material
Source: publisher site journal article supplement (https://www.dovepress.com/article/257703)
Supplement: Supplementary file 1 [file get_supplementary_file.php]

**The study questionnaire**

Age: ……………

Gender: □ male □ female

Weight ……. Height……

Do you exercise?

□ yes □ No

Do you have any comorbidities?

□ yes □ No

Duration of hypothyroidism

□ 1-5 years □ 6-10 years □ 11 years and above

Do you follow your condition in the clinic on a regular basis?

□ yes □ No

Have you received an education about hypothyroidism?

□ yes □ No

Do you access your physician easily?

□ yes □ No

Do you spend enough time with your physician during the visit?

□ yes □ No

Do you follow your physician’s instructions?

□ yes □ No

From where do you obtain your medications?

□ Free from the clinic □ Bought from pharmacies

**The Brief Illness Perception Questionnaire**

For the following questions, please circle the number that best corresponds to your views:

| **How much does your illness affect your life?**  0 1 2 3 4 5 6 7 8  no affect at all | 9 | 10  severely affects my life |
| --- | --- | --- |
| **How long do you think your illness will continue?**  0 1 2 3 4 5 6 7 8  a very short time | 9 | 10  forever |
| **How much control do you feel you have over your illness?**  0 1 2 3 4 5 6 7 8  absolutely no control | 9 | 10  extreme amount of control |
| **How much do you think your treatment can help your illness?**  0 1 2 3 4 5 6 7 8  not at all | 9 | 10  extremely helpful |
| **How much do you experience symptoms from your illness?**  0 1 2 3 4 5 6 7 8  no symptoms at all | 9 | 10  many severe symptoms |
| **How concerned are you about your illness?**  0 1 2 3 4 5 6 7 8  not at all concerned | 9 | 10  extremely concerned |
| **How well do you feel you understand your illness?**  0 1 2 3 4 5 6 7 8  don't understand at all | 9 | 10  understand very clearly |
| **How much does your illness affect you emotionally? (e.g. does it make you angry, scared, upset or depressed?**  0 1 2 3 4 5 6 7 8 9 10  not at all extremely  affected affected  emotionally emotionally | | |

the BIPQ has just one single item to assess each dimension, rated on a 0-to-10 scale. Higher scores indicate stronger perceptions along that dimension.

**12-Item Medication Adherence Scale**

| **Medication compliance** | | | | | |
| --- | --- | --- | --- | --- | --- |
| 1. Over the past three weeks, I have taken the prescribed daily dosage of my medication. | never | rarely | sometimes | often | always |
| 2) Over the past three weeks, I have followed the instructions about when or how often to take my medication. | never | rarely | sometimes | often | always |
| 3) I have stopped taking medication based on my own judgment (not including times when I forgot to  take my medication) | never | rarely | sometimes | often | always |
| **Collaboration withn healthcare providers** | | | | | |
| 4) I feel comfortable asking my healthcare provider about my medication. | never | rarely | sometimes | often | always |
| 5) My healthcare provider understands when I tell him/her about my preferences in medication taking. | never | rarely | sometimes | often | always |
| 6) My healthcare provider understands when I explain to him/her about my past medication including previous  allergic reactions. | never | rarely | sometimes | often | always |
| **Willingness to access and use information about medication** | | | | | |
| 7) I understand both the effects and the side effects of my medication. | never | rarely | sometimes | often | always |
| 8) I report side effects, allergic reactions, or unusual symptoms  caused by the medication. | never | rarely | sometimes | often | always |
| 9) I personally search for and collect information that I want about my  medicine. | never | rarely | sometimes | often | always |
| **Acceptance to take medication and how taking medication fits patient’s lifestyle** | | | | | |
| 10) I accept the necessity of taking  medication in the prescribed manner to treat my illness. | never | rarely | sometimes | often | always |
| 11) Taking medication is part of my everyday life, just like eating or  brushing my teeth. | never | rarely | sometimes | often | always |
| 12) I sometimes get annoyed that I have to keep taking medicine every day. | never | rarely | sometimes | often | always |

Copyright ©2018 Copyright Holder. Reproduced from Ueno H, Yamazaki Y, Yonekura Y, Park M, Ishikawa H, Kiuchi T. Reliability and validity of a 12-item medication adherence scale for patients with chronic disease in Japan. BMC Health Serv Res. 2018;18(1):592. doi.org/10.1186/s12913-018-3380-7. 31

The questionnaire included the 12-item Medication Adherence Scale, categorized according to the four assessment factors, each of which contained three items.

Each item was rated on a five-point Likert-type scale, with answers ranging from 1 (never) to 5 (always).

Scores for the items on each subscale were summed to give a subscale score and an overall medication adherence score was also calculated by adding all 12 items.

**Scores were reversed for items 3) and 12)**, such that higher scores indicated higher medication adherence.

31. Ueno H, Yamazaki Y, Yonekura Y, Park M, Ishikawa H, Kiuchi T. Reliability and validity of a 12-item medication adherence scale for patients with chronic disease in Japan. BMC Health Serv Res. 2018;18(1):592. doi.org/10.1186/s12913-018-3380-7
